# Supplementary material for: Alternative antibiotic feed additives alleviate pneumonia with inhibiting ACE‐2 expression in the respiratory system of piglets
Source: PubMed Central journal article supplement (PMC7866577; doi:10.1002/fsn3.2089), 2020-12-27
Supplement: FSN3-9-1112-s001.pdf [file FSN3-9-1112-s001.pdf]

### Supplementary table 1:

The content of bioactive marker substances in GLZ

| Composition               | content (mg/g) |
|---------------------------|----------------|
| Atractylodes macrocephala | 889            |
| Panax ginseng             | 889            |
| Glycyrrhiza uralensis     | 889            |
| Zingiber officinale       | 667            |
| Cinnamomum cassia Presl   | 402            |

### Supplementary table 2:

Effect of GLZ on biochemical parameters in porcine blood

| Biochemical parameters       | Sham      | TAB        | GLZ       |
|------------------------------|-----------|------------|-----------|
| Glucose (mg/dL)              | 134 ± 36  | 105 ± 26   | 118 ± 3.0 |
| Creatinine (mg/dL)           | 0.8 ± 0.2 | 0.8 ± 0.1  | 0.6 ± 0.1 |
| Blood urea nitrogen (mg/dL)  | 3.0 ± 1.0 | 5.0 ± 1.0* | 3.0 ± 1.0 |
| Total protein (g/dL)         | 7.2 ± 0.7 | 6.5 ± 0.3  | 7.8 ± 1.0 |
| Globulin (g/dL)              | 4.4 ± 0.4 | 3.8 ± 0.5  | 4.3 ± 0.5 |
| Alanine transamidation (U/L) | 181 ± 128 | 75.0 ± 10  | 91.0 ± 28 |
| Alkaline phosphatase (U/L)   | 96 ± 30   | 213 ± 121* | 29 ± 24   |

\*:  $p < 0.05$
